# Supplementary material
Source: HighWire-hosted journal article supplement (https://jitc.bmj.com/content/8/2/e000964)

Supplemental Figure 2. Tumor growth in various syngeneic tumor models with WT and PD-L1 KO

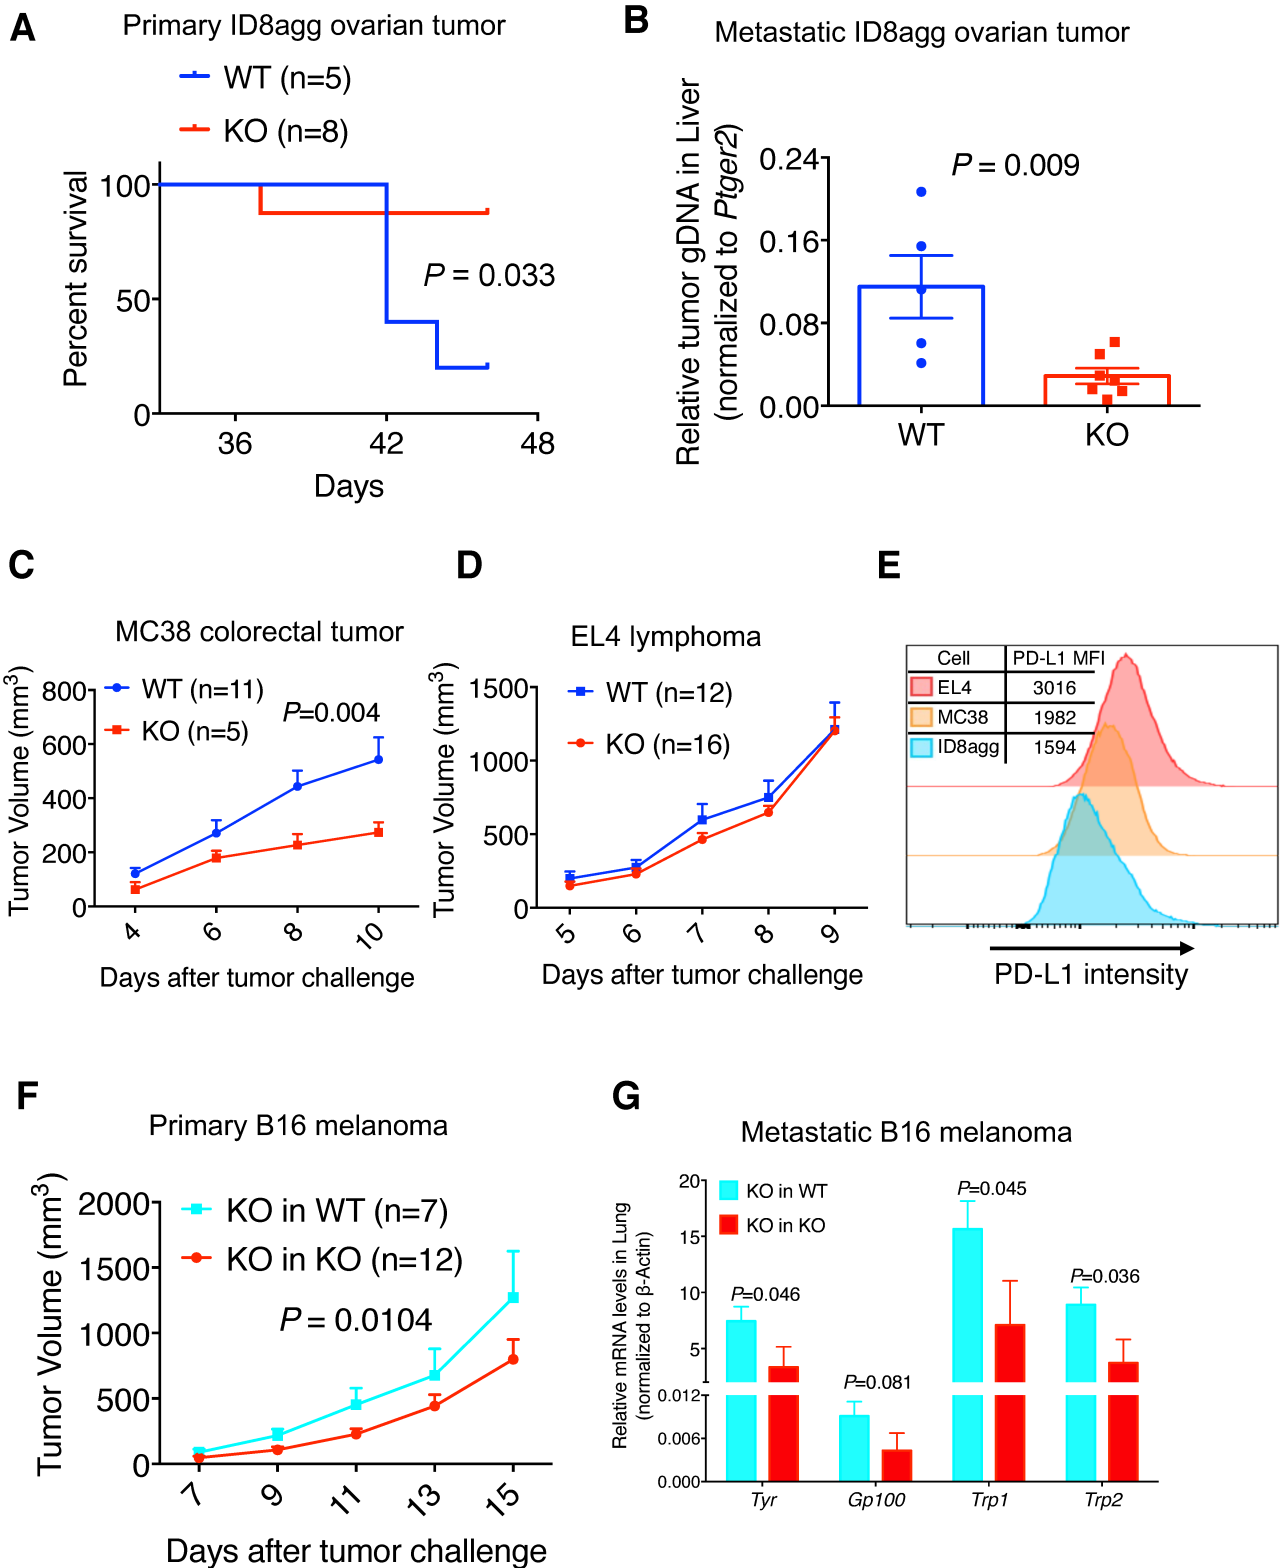

Supplement: inline-supplementary-material-2 [file inline-supplementary-material-2.pdf]
